# Supplementary material for: A Strategy for Identification and Structural Characterization of Compounds from Plantago asiatica L. by Liquid Chromatography-Mass Spectrometry Combined with Ion Mobility Spectrometry
Source: MDPI journal article supplement (doi:10.3390/molecules27134302), 2022-07-04
Supplement: s1 [file s1]

## Article

# A Strategy for Identification and Structural Characterization of Compounds from *Plantago asiatica* L. by Liquid Chromatography-Mass Spectrometry Combined with Ion Mobility Spectrometry

Hongxue Gao <sup>1,2</sup>, Zhiqiang Liu <sup>1,2,3,\*</sup>, Fengrui Song <sup>1</sup>, Junpeng Xing <sup>1</sup>, Zhong Zheng <sup>1</sup> and Shu Liu <sup>1,\*</sup>

<sup>1</sup> Jilin Provincial Key Laboratory of Chinese Medicine Chemistry, Changchun Institute of Applied Chemistry, Chinese Academy of Sciences, Changchun 130022, China; mslab34@ciac.ac.cn (H.G.); songfr@ciac.ac.cn (F.S.); xjp@ciac.ac.cn (J.X.); zhengzh@ciac.ac.cn (Z.Z.)

<sup>2</sup> Institute of Applied Chemistry and Engineering, University of Science and Technology of China, Hefei 230029, China

<sup>3</sup> State Key Laboratory of Electroanalytical Chemistry, Changchun Institute of Applied Chemistry, Chinese Academy of Sciences, Changchun 130022, China

\* Correspondence: liuzq@ciac.ac.cn (Z.L.); mslab20@ciac.ac.cn (S.L.); Tel.: +86-431-85262613 (S.L.); Fax: +86-431-85262044 (Z.L.)

**Abstract:** *Plantago asiatica* L. (PAL) as a medicinal and edible plant is rich in chemical compounds, which makes the systematic and comprehensive characterization of its components challenging. In this study, an integrated strategy based on three-dimensional separation including AB-8 macroporous resin column chromatography, ultra-high performance liquid chromatography–quadrupole time-of-flight mass spectrometry (UHPLC-Q-TOF MS), and ultra-high performance liquid chromatography-mass spectrometry with ion-mobility spectrometry (UHPLC-IM-MS) was established and used to separate and identify the structures of compounds from PAL. The extracts of PAL were firstly separated into three parts by AB-8 macroporous resin and further separated and identified by UHPLC-Q-TOF MS and UHPLC-IM-MS, respectively. Additionally, UHPLC-IM-MS was used to identify isomers and coeluting compounds, so that the product ions appearing at the same retention time (RT) can clearly distinguish where the parent ion belongs by their different drift times. UNIFI software was used for data processing and structure identification. A total of 86 compounds, including triterpenes, iridoids, phenylethanoid glycosides, guanidine derivatives, organic acids, and fatty acids, were identified by using MS information and fragment ion information provided by UHPLC-Q-TOF MS and UHPLC-IM-MS. In particular, a pair of isoforms of plantagoside from PAL were detected and identified by UHPLC-IM-MS combined with the theoretical calculation method for the first time. In conclusion, the AB-8 macroporous resin column chromatography can separate the main compounds of PAL and enrich the trace compounds. Combining UHPLC-IM-MS and UHPLC-Q-TOF MS can obtain not only more fragments but also their unique drift times and RT, which is more conducive to the identification of complex systems, especially isomers. This proposed strategy can provide an effective method to separate and identify chemical components, and distinguish isomers in the complex system of traditional Chinese medicine (TCM).

**Keywords:** *Plantago asiatica* L.; UHPLC-Q-TOF MS; ion mobility spectrometry; macroporous resin

**Table S1.** Compounds identified from *Plantago asiatica* L by MS.

| No. | RT<br>(min) | Observed<br>m/z | Calculated<br>m/z | Molecular<br>formula                                          | mDa  | Major fragments m/z                                        | Proposed compound                   | Class                       |
|-----|-------------|-----------------|-------------------|---------------------------------------------------------------|------|------------------------------------------------------------|-------------------------------------|-----------------------------|
| 1   | 0.60        | 195.0493        | 195.0505          | C <sub>6</sub> H <sub>11</sub> O <sub>7</sub>                 | -6.2 | 195.0396,181.0583,129.0<br>060,98.9940, 74.9925            | Gluconic acid                       | Organic acid                |
| 2   | 0.86        | 260.1609        | 260.1610          | C <sub>11</sub> H <sub>22</sub> N <sub>3</sub> O <sub>4</sub> | -0.4 | 242.1490,224.1399,206.0<br>998,192.9579,84.0431            | Hydroxyplantagoam-<br>idinic acid b | Guanidine de-<br>rivative   |
| 3   | 1.16        | 345.1183        | 345.1186          | C <sub>15</sub> H <sub>22</sub> O <sub>9</sub>                | -0.8 | 183.0656,165.0552,139.0<br>260                             | Aucubin*                            | Iridoid                     |
| 4   | 1.23        | 240.1335        | 240.1339          | C <sub>11</sub> H <sub>18</sub> N <sub>3</sub> O <sub>3</sub> | -1.7 | 222.1206,184.0674,84.04<br>35                              | Planasine a                         | Guanidine de-<br>rivative   |
| 5   | 1.41        | 345.1165        | 345.1186          | C <sub>15</sub> H <sub>22</sub> O <sub>9</sub>                | -6.1 | 391.1240,183.0679                                          | Aucubin*                            | Iridoid                     |
| 6   | 1.42        | 191.0197        | 191.0192          | C <sub>6</sub> H <sub>7</sub> O <sub>7</sub>                  | 2.6  | 191.0433,129.0414,115.0<br>264,101.0459                    | Citric acid                         | Organic acid                |
| 7   | 1.46        | 507.1722        | 507.1719          | C <sub>21</sub> H <sub>32</sub> O <sub>14</sub>               | 0.6  | 329.1226,179.0559                                          | 6'-o-glucosylaucubin                | Iridoid                     |
| 8   | 1.55        | 535.1673        | 535.1668          | C <sub>22</sub> H <sub>32</sub> O <sub>15</sub>               | 0.9  | 373.3337,221.0613,193.0<br>350,<br>211.0615,167.0591,149.0 | Desacetylhookerio-<br>side*         | Iridoid                     |
| 9   | 2.03        | 373.1145        | 373.1135          | C <sub>16</sub> H <sub>22</sub> O <sub>10</sub>               | 2.7  | 609,123.0354,101.0096,8<br>6.9932                          | Geniposidic acid                    | Iridoid                     |
| 10  | 2.43        | 242.1353        | 242.1348          | C <sub>11</sub> H <sub>20</sub> N <sub>3</sub> O <sub>3</sub> | 2.1  | 224.1373,178.1281,84.04<br>36                              | Dehydroplantagoam-<br>idinic acid B | Guanidine de-<br>rivative   |
| 11  | 2.52        | 375.1291        | 375.1291          | C <sub>16</sub> H <sub>24</sub> O <sub>10</sub>               | 0    | 213.0763,169.0746,151.0<br>634                             | 8-epiloganic acid                   | Iridoid                     |
| 12  | 2.67        | 535.1673        | 535.1668          | C <sub>22</sub> H <sub>32</sub> O <sub>15</sub>               | 0.9  | 373.1133,211.0610,149.0<br>501                             | Desacetylhookerio-<br>side*         | Iridoid                     |
| 13  | 2.82        | 375.1286        | 375.1291          | C <sub>16</sub> H <sub>24</sub> O <sub>10</sub>               | -1.3 | 161.0451,113.0241                                          | 8-epiloganic acid                   | Iridoid                     |
| 14  | 2.83        | 461.1658        | 461.1659          | C <sub>20</sub> H <sub>29</sub> O <sub>12</sub>               | -0.2 | 315.1081,298.0852,161.0<br>451                             | Decaffeoylacteoside                 | Phenylethanoid<br>glucoside |
| 15  | 3.31        | 487.1459        | 487.1457          | C <sub>21</sub> H <sub>28</sub> O <sub>13</sub>               | 0.4  | 341.0932,179.0347,161.0<br>240                             | Cistanoside F*                      | Phenylethanoid<br>glucoside |
| 16  | 3.57        | 355.1034        | 355.1029          | C <sub>16</sub> H <sub>20</sub> O <sub>9</sub>                | 1.4  | 193.0504,151.0395                                          | Gentiopicroside*                    | Iridoid                     |

|    |      |          |          |                                                               |      |                                                       |                                 |                          |
|----|------|----------|----------|---------------------------------------------------------------|------|-------------------------------------------------------|---------------------------------|--------------------------|
| 17 | 4.10 | 224.1387 | 224.1399 | C <sub>11</sub> H <sub>18</sub> N <sub>3</sub> O <sub>2</sub> | -5.4 | 206.0946,178.1293,84.0433                             | Plumbagine B                    | Guanidine derivative     |
| 18 | 4.34 | 179.0350 | 179.0344 | C <sub>9</sub> H <sub>7</sub> O <sub>4</sub>                  | 3.4  | 135.0325                                              | Caffeic acid                    | Organic acid             |
| 19 | 4.39 | 481.0987 | 481.0982 | C <sub>21</sub> H <sub>21</sub> O <sub>13</sub>               | 1.0  | 319.0374,166.9883,151.0294                            | Ampelopsin glucoside*           | Flavonoid                |
| 20 | 4.69 | 355.1035 | 355.1029 | C <sub>16</sub> H <sub>20</sub> O <sub>9</sub>                | 1.7  | 295.0715,265.0613,235.0395,193.0500,175.0392          | Gentiopicroside*                | Iridoid                  |
| 21 | 4.82 | 487.1467 | 487.1457 | C <sub>21</sub> H <sub>28</sub> O <sub>13</sub>               | 2.1  | 341.1013,193.0500,179.0336                            | Cistanoside F*                  | Phenylethanoid glucoside |
| 22 | 4.88 | 685.2009 | 685.1985 | C <sub>29</sub> H <sub>36</sub> O <sub>16</sub>               | 3.5  | 623.1984,161.0455                                     | Orobanchoside*                  | Phenylethanoid glucoside |
| 23 | 5.09 | 415.1258 | 415.1246 | C <sub>18</sub> H <sub>24</sub> O <sub>11</sub>               | 2.9  | 235.0605,135.0446                                     | Alpinoside                      | Iridoid                  |
| 24 | 5.17 | 481.0987 | 481.0982 | C <sub>21</sub> H <sub>21</sub> O <sub>13</sub>               | 1.0  | 319.0471,166.9983,151.0400                            | Ampelopsin glucoside*           | Flavonoid                |
| 25 | 5.41 | 655.1890 | 655.1880 | C <sub>29</sub> H <sub>36</sub> O <sub>17</sub>               | 1.5  | 492.1299,161.0232                                     | Hellicoside                     | Phenylethanoid glucoside |
| 26 | 5.67 | 665.2093 | 665.2087 | C <sub>31</sub> H <sub>38</sub> O <sub>16</sub>               | 0.9  | 503.1667                                              | 2'-acetylacteoside*             | Phenylethanoid glucoside |
| 27 | 5.80 | 465.1034 | 465.1033 | C <sub>21</sub> H <sub>22</sub> O <sub>12</sub>               | 0.2  | 303.0506,179.0349,161.0241,151.0396                   | Plantagoside*                   | Flavonoid                |
| 28 | 5.84 | 639.1930 | 639.1925 | C <sub>29</sub> H <sub>36</sub> O <sub>16</sub>               | 0.8  | 621.1794,313.1022,303.0506,161.0241,179.0349,151.0396 | Suspensaside                    | Phenylethanoid glucoside |
| 29 | 6.22 | 463.0864 | 463.0877 | C <sub>21</sub> H <sub>20</sub> O <sub>12</sub>               | -2.8 | 285.0400,135.0499,164.9827                            | 6-hydroxyluteolin-7-O-glucoside | Flavonoid                |
| 30 | 6.38 | 226.1568 | 226.1556 | C <sub>11</sub> H <sub>20</sub> N <sub>3</sub> O <sub>2</sub> | 5.3  | 208.1446,180.1443,84.0453                             | Plantagoguanidinic acid         | Guanidine derivative     |
| 31 | 6.89 | 639.1956 | 639.1925 | C <sub>29</sub> H <sub>36</sub> O <sub>16</sub>               | 4.8  | 477.1627,315.1088,161.0252                            | Plantamajoside                  | Phenylethanoid glucoside |
| 32 | 6.92 | 465.1050 | 465.1033 | C <sub>21</sub> H <sub>22</sub> O <sub>12</sub>               | 3.7  | 313.0939,303.0516,151.0402                            | Plantagoside*                   | Flavonoid                |
| 33 | 6.92 | 465.1050 | 465.1033 | C <sub>21</sub> H <sub>22</sub> O <sub>12</sub>               | 3.7  | 313.0939,303.0516,151.0402                            | Plantagoside*                   | Flavonoid                |

|    |      |          |          |                                                 |      |                                                        |                               |                          |
|----|------|----------|----------|-------------------------------------------------|------|--------------------------------------------------------|-------------------------------|--------------------------|
| 34 | 6.92 | 465.1050 | 465.1033 | C <sub>21</sub> H <sub>22</sub> O <sub>12</sub> | 3.7  | 313.0939,303.0516,151.0402                             | Plantagoside*                 | Flavonoid                |
| 35 | 6.95 | 665.2081 | 665.2087 | C <sub>31</sub> H <sub>38</sub> O <sub>16</sub> | -0.9 | 503.1667                                               | 2'-acetylacteoside*           | Phenylethanoid glucoside |
| 36 | 6.98 | 449.1107 | 449.1089 | C <sub>21</sub> H <sub>22</sub> O <sub>11</sub> | 4.0  | 495.1162,150.0320,134.0373                             | Miscanthoside*                | Flavonoid                |
| 37 | 7.00 | 463.0890 | 463.0877 | C <sub>21</sub> H <sub>21</sub> O <sub>12</sub> | 2.8  | 303.0498,257.0465,153.0180                             | Isoquercitrin                 | Flavonoid                |
| 38 | 7.17 | 303.0512 | 303.0505 | C <sub>15</sub> H <sub>12</sub> O <sub>7</sub>  | 2.3  | 181.0511                                               | Pntahydroxyflavanone*         | Flavonoid                |
| 39 | 7.28 | 593.1527 | 593.1506 | C <sub>27</sub> H <sub>29</sub> O <sub>15</sub> | 3.5  | 447.0962,285.0394,151.0391                             | Kempferol rhamnoside hexoside | Flavonoid                |
| 40 | 7.29 | 447.0934 | 447.0927 | C <sub>21</sub> H <sub>20</sub> O <sub>11</sub> | 1.6  | 285.04064,151.1350                                     | Maritimein                    | Flavonoid                |
| 41 | 7.35 | 479.1202 | 479.1195 | C <sub>22</sub> H <sub>24</sub> O <sub>12</sub> | 1.5  | 447.0934,285.0406                                      | Nepetin-7-O-glucoside         | Flavonoid                |
| 42 | 7.38 | 623.2022 | 623.1976 | C <sub>29</sub> H <sub>36</sub> O <sub>15</sub> | 7.4  | 461.1682,315.1094,179.0357,161.0254                    | Acteoside                     | Phenylethanoid glucoside |
| 43 | 7.85 | 639.1958 | 639.1925 | C <sub>29</sub> H <sub>36</sub> O <sub>16</sub> | 5.2  | 477.1619,313.0938                                      | Orobanchoside*                | Phenylethanoid glucoside |
| 44 | 8.05 | 623.2001 | 623.1976 | C <sub>29</sub> H <sub>36</sub> O <sub>15</sub> | 4.0  | 461.1671,315.1084,179.0351,161.0251                    | Isoacteoside                  | Phenylethanoid glucoside |
| 45 | 8.45 | 623.1992 | 623.1976 | C <sub>29</sub> H <sub>36</sub> O <sub>15</sub> | 2.6  | 461.1663,315.1084,179.0348,161.0247                    | Forsythiaside                 | Phenylethanoid glucoside |
| 46 | 8.57 | 303.0516 | 303.0510 | C <sub>15</sub> H <sub>12</sub> O <sub>7</sub>  | 2.0  | 177.0196,151.0400,125.0966                             | Pntahydroxyflavanone*         | Flavonoid                |
| 47 | 8.64 | 577.1572 | 577.1557 | C <sub>27</sub> H <sub>30</sub> O <sub>14</sub> | 2.6  | 431.0889,413.0868,269.0456,151.0057,146.9570           | Rhoifolin                     | Flavonoid                |
| 48 | 9.11 | 477.1418 | 477.1402 | C <sub>23</sub> H <sub>26</sub> O <sub>11</sub> | 3.4  | 311.0658                                               | Isorhamnetin-3-O-glucoside    | Phenylethanoid glucoside |
| 49 | 9.16 | 637.2151 | 637.2132 | C <sub>30</sub> H <sub>38</sub> O <sub>15</sub> | 3.0  | 461.1673,443.1542,315.1097,297.0935,193.0510,175.0404, | Leucoseptoside A              | Phenylethanoid glucoside |
| 50 | 9.35 | 287.0560 | 287.0556 | C <sub>15</sub> H <sub>12</sub> O <sub>6</sub>  | 1.4  | 151.0039,135.0452                                      | Eriodictyol*                  | Flavonoid                |

|    |       |          |          |                                                 |      |                                                       |                                  |                             |
|----|-------|----------|----------|-------------------------------------------------|------|-------------------------------------------------------|----------------------------------|-----------------------------|
| 51 | 9.35  | 449.1098 | 449.1084 | C <sub>21</sub> H <sub>22</sub> O <sub>11</sub> | 3.1  | 287.0563,151.0039,135.0452                            | Miscanthoside*                   | Flavonoid                   |
| 52 | 9.36  | 597.2162 | 597.2183 | C <sub>28</sub> H <sub>37</sub> O <sub>14</sub> | -3.5 | 161.0169                                              | Picraquassioside C               | Phenylethanoid glucoside    |
| 53 | 9.49  | 665.2065 | 665.2087 | C <sub>31</sub> H <sub>38</sub> O <sub>16</sub> | -3.3 | 461.1659,285.0404,161.0246                            | 2'-acetylacteoside*              | Phenylethanoid glucoside    |
| 54 | 9.95  | 421.2080 | 421.2074 | C <sub>19</sub> H <sub>33</sub> O <sub>10</sub> | 1.4  | 289.1665,175.0405,161.0459,143.0237,113.0108,101.0244 | 1-octen-3-yl-pri-meverside       | Aliphatic alcohol glycoside |
| 55 | 10.04 | 651.2311 | 651.2289 | C <sub>31</sub> H <sub>40</sub> O <sub>15</sub> | 3.4  | 503.1571,337.0934,193.0511,179.0405,161.0231          | Martynoside                      | Phenylethanoid glucoside    |
| 56 | 10.04 | 299.0567 | 299.0561 | C <sub>16</sub> H <sub>12</sub> O <sub>6</sub>  | 2.0  | 268.0384,161.0231,151.0073                            | Hispidulin                       | Flavonoid                   |
| 57 | 10.38 | 287.0567 | 287.0556 | C <sub>15</sub> H <sub>12</sub> O <sub>6</sub>  | 3.8  | 151.0041,135.0453                                     | Eriodictyol*                     | Flavonoid                   |
| 58 | 10.45 | 285.0412 | 285.0399 | C <sub>15</sub> H <sub>10</sub> O <sub>6</sub>  | 4.6  | 179.0354,133.0296                                     | Luteoline                        | Flavonoid                   |
| 59 | 11.13 | 327.2175 | 327.2171 | C <sub>18</sub> H <sub>31</sub> O <sub>5</sub>  | 1.2  | 229.1449,211.1338,171.1024                            | Trihydroxy-octadecadienoic*      | Fatty acid                  |
| 60 | 11.53 | 329.2337 | 329.2328 | C <sub>18</sub> H <sub>33</sub> O <sub>5</sub>  | 2.7  | 211.1233,171.1028                                     | Hydroxyoctadecanenediic acid     | Fatty acid                  |
| 61 | 11.80 | 287.2229 | 287.2222 | C <sub>16</sub> H <sub>31</sub> O <sub>4</sub>  | 2.4  | 121.0207                                              | Dihydroxypacmitic acid*          | Fatty acid                  |
| 62 | 12.47 | 255.2323 | 255.2324 | C <sub>16</sub> H <sub>32</sub> O <sub>2</sub>  | -0.4 | 301.2378,197.1079                                     | Palmitic acid                    | Fatty acid                  |
| 63 | 12.73 | 327.2177 | 327.2171 | C <sub>18</sub> H <sub>31</sub> O <sub>5</sub>  | 1.8  | 197.1078,171.1026                                     | Trihydroxy-octadecadienoic*      | Fatty acid                  |
| 64 | 14.21 | 313.2384 | 313.2379 | C <sub>18</sub> H <sub>31</sub> O <sub>4</sub>  | 1.6  | 307.1809,235.1214,211.1243,185.1076                   | Hydroperoxy-octadecenoic acid*   | Fatty acid                  |
| 65 | 14.21 | 311.2229 | 311.2222 | C <sub>18</sub> H <sub>31</sub> O <sub>4</sub>  | 2.2  | 201.1034,171.0915                                     | Hydroperoxyl-octadecanediic acid | Fatty acid                  |
| 66 | 14.96 | 287.2227 | 287.2222 | C <sub>16</sub> H <sub>31</sub> O <sub>4</sub>  | 1.7  |                                                       | Dihydroxypacmitic acid*          | Fatty acid                  |
| 67 | 15.23 | 313.2349 | 313.2379 | C <sub>18</sub> H <sub>31</sub> O <sub>4</sub>  | -9.6 | 277.2063,201.1030,183.1294                            | Hydroperoxy-octadecenoic acid*   | Fatty acid                  |

|    |       |          |          |                                                   |      |                                     |                                |                        |
|----|-------|----------|----------|---------------------------------------------------|------|-------------------------------------|--------------------------------|------------------------|
| 68 | 15.34 | 593.2761 | 593.2756 | C <sub>27</sub> H <sub>46</sub> O <sub>12</sub> P | 0.8  | 315.0508,241.0132                   | Pi(18:3/0:0)                   | Glycerophospho-holipid |
| 69 | 15.75 | 313.2400 | 313.2379 | C <sub>18</sub> H <sub>31</sub> O <sub>4</sub>    | 6.7  | 295.2193,201.1141,171.1033          | Hydroperoxy-octadecenoic acid* | Fatty acid             |
| 70 | 15.86 | 593.2756 | 593.2756 | C <sub>27</sub> H <sub>46</sub> O <sub>12</sub> P | 0    | 413.2106,315.0497,277.2781,241.0128 | Pi(18:3/0:0)                   | Glycerophospho-holipid |
| 71 | 16.75 | 595.2889 | 595.2883 | C <sub>27</sub> H <sub>48</sub> O <sub>12</sub> P | 1.0  | 279.2256,241.0045,152.9874          | Pi(18:2/0:0)*                  | Glycerophospho-holipid |
| 72 | 16.85 | 315.2539 | 315.2535 | C <sub>18</sub> H <sub>35</sub> O <sub>4</sub>    | 1.3  | 297.2434,171.1026,141.1270          | Dihydroxy-stearic acid*        | Fatty acid             |
| 73 | 17.42 | 595.2900 | 595.2883 | C <sub>27</sub> H <sub>48</sub> O <sub>12</sub> P | 2.9  | 279.2269,241.0062,152.9901          | Pi(18:2/0:0)*                  | Glycerophospho-holipid |
| 74 | 17.49 | 315.2538 | 315.2535 | C <sub>18</sub> H <sub>35</sub> O <sub>4</sub>    | 1.0  | 297.2431,171.1026,141.1283          | Dihydroxy-stearic acid*        | Fatty acid             |
| 75 | 17.85 | 571.2898 | 571.2883 | C <sub>25</sub> H <sub>48</sub> O <sub>12</sub> P | 2.6  | 255.2330,241.0123                   | Pi(16:0/0:0)*                  | Glycerophospho-holipid |
| 76 | 18.59 | 571.2909 | 571.2883 | C <sub>25</sub> H <sub>48</sub> O <sub>12</sub> P | 4.6  | 255.2335,241.0128                   | Pi(16:0/0:0)*                  | Glycerophospho-holipid |
| 77 | 19.58 | 597.3058 | 597.3040 | C <sub>27</sub> H <sub>50</sub> O <sub>12</sub> P | 3.0  | 417.2408,281.2485,241.0124          | Pi(18:1/0:0)                   | Glycerophospho-holipid |
| 78 | 20.09 | 297.2433 | 297.2430 | C <sub>18</sub> H <sub>33</sub> O <sub>3</sub>    | 1.0  |                                     | Hydroxyl-octadecadienoic acid  | Fatty acid             |
| 79 | 20.55 | 293.2121 | 293.2117 | C <sub>18</sub> H <sub>29</sub> O <sub>3</sub>    | 1.4  |                                     | Hydroxy-octadecatrienoic acid  | Fatty acid             |
| 80 | 22.22 | 277.2171 | 277.2168 | C <sub>18</sub> H <sub>29</sub> O <sub>2</sub>    | 1.1  |                                     | Linolenic acid                 | Fatty acid             |
| 81 | 22.24 | 455.3529 | 455.3530 | C <sub>30</sub> H <sub>48</sub> O <sub>3</sub>    | -0.2 | 407.1740                            | Oleanolic acid                 | Triterpenoid           |
| 82 | 22.37 | 338.2700 | 338.2700 | C <sub>20</sub> H <sub>37</sub> NO <sub>3</sub>   | 0    | 384.2755,281.2481                   | N-oleoyl glycine               | Fatty amide            |
| 83 | 22.63 | 455.3539 | 455.3530 | C <sub>30</sub> H <sub>48</sub> O <sub>3</sub>    | 2.0  | 407.1740                            | Ursolic acid                   | Triterpenoid           |
| 84 | 23.08 | 313.2381 | 313.2379 | C <sub>18</sub> H <sub>33</sub> O <sub>4</sub>    | 0.6  | 201.1128,171.1025                   | Hydroperoxy-octadecenoic acid* | Fatty acid             |
| 85 | 23.20 | 281.2488 | 281.2481 | C <sub>18</sub> H <sub>34</sub> O <sub>2</sub>    | 2.5  | 96.9461                             | Oleic acid                     | Fatty acid             |
| 86 | 23.44 | 453.3369 | 453.3374 | C <sub>30</sub> H <sub>46</sub> O <sub>3</sub>    | -1.1 | 407.3376                            | Ursonic acid                   | Triterpenoid           |

\* These compounds have been detected as isomers from *Plantago asiatica* L.

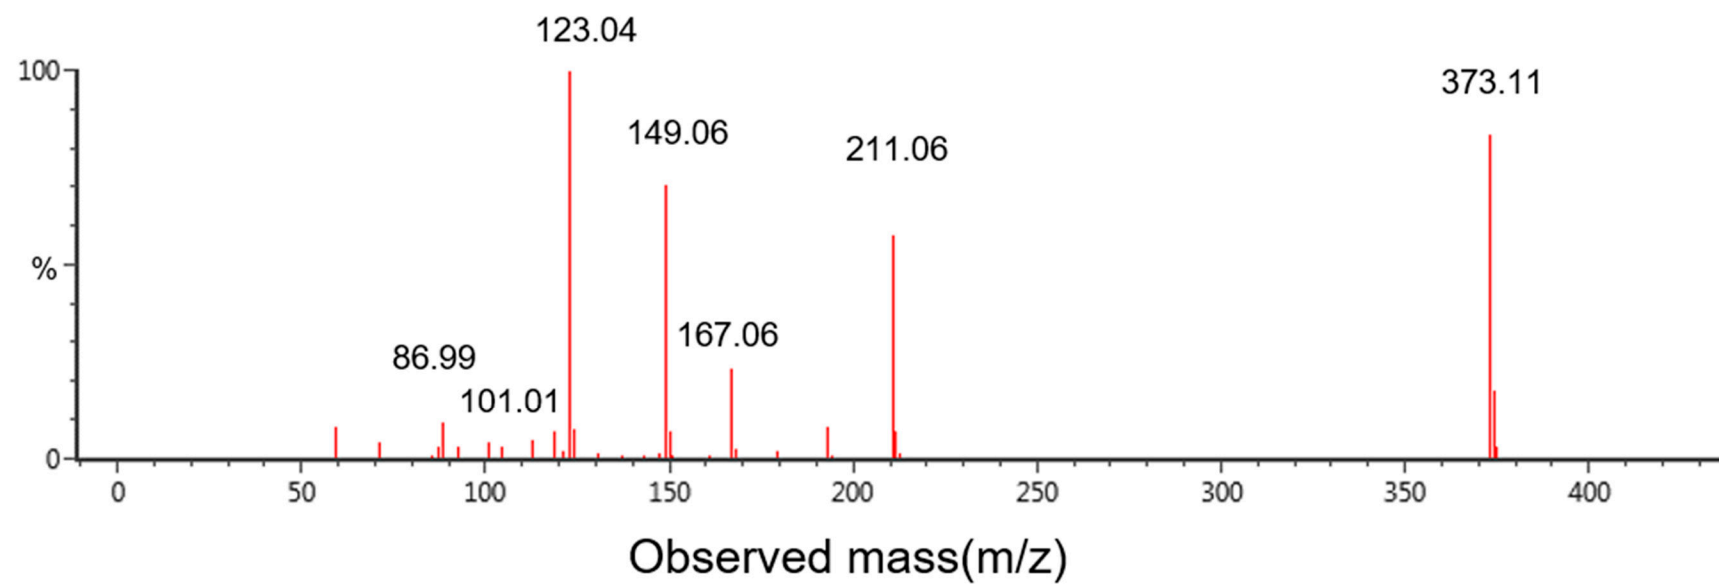

**Figure S1.** The fragment ion information of geniposidic acid (compound 9) recorded by UHPLC-Q-TOF-MS.

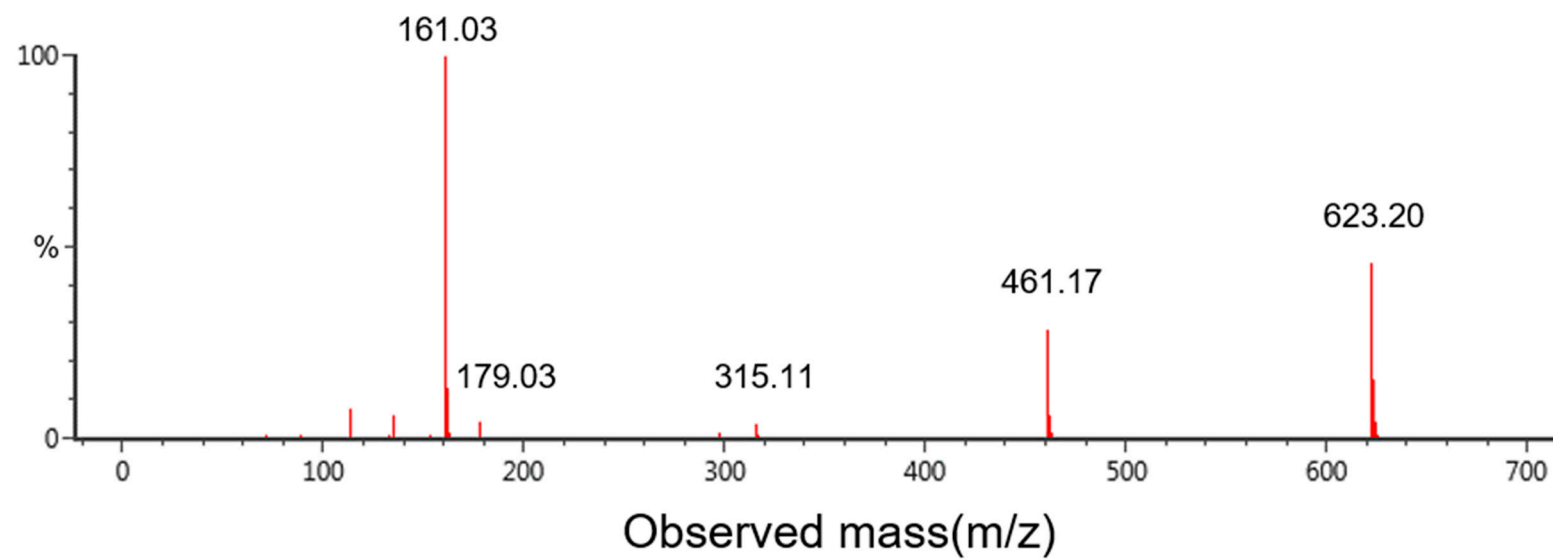

**Figure S2.** The fragment ion information of acteoside (compound 42) recorded by UHPLC-Q-TOF-MS.



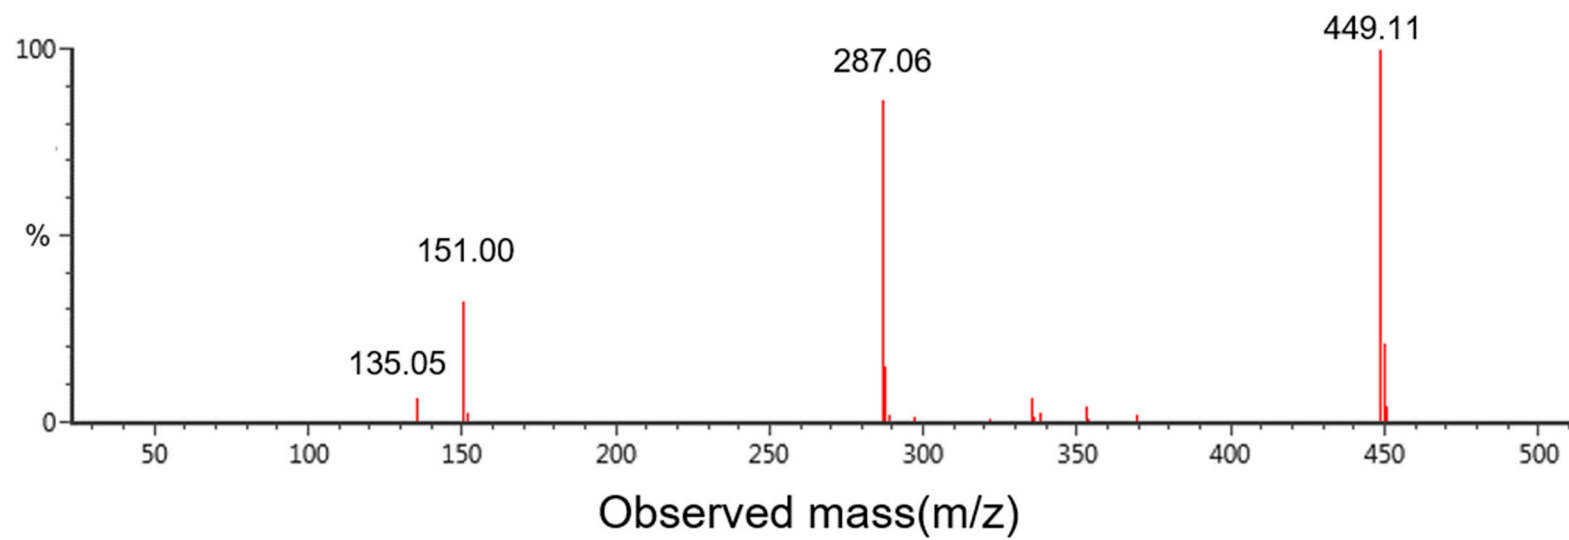

**Figure S3.** The fragment ion information of miscanthoside (compound 51) recorded by UHPLC-Q-TOF-MS.
